# Supplementary material for: Upc2-mediated mechanisms of azole resistance in Candida auris
Source: PubMed Central journal article supplement (PMC10845950; doi:10.1128/spectrum.03526-23), 2024-01-11
Supplement: reviewer-comments.pdf [file reviewer-comments.pdf]

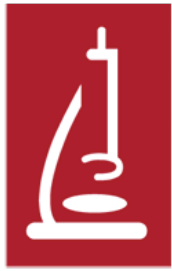

AMERICAN  
SOCIETY FOR  
MICROBIOLOGY

# Microbiology Spectrum

## Upc2-mediated mechanisms of azole resistance in *Candida auris*

Jizhou Li, Lola Aubry, Danielle Brandalise, Alix Coste, Dominique Sanglard, and Frederic Lamoth

*Corresponding Author(s): Frederic Lamoth, Centre Hospitalier Universitaire Vaudois*

---

### Review Timeline:

|                     |                   |
|---------------------|-------------------|
| Submission Date:    | October 3, 2023   |
| Editorial Decision: | November 7, 2023  |
| Revision Received:  | December 12, 2023 |
| Accepted:           | December 13, 2023 |

---

*Editor: Dimitrios Kontoyiannis*

*Reviewer(s): Disclosure of reviewer identity is with reference to reviewer comments included in decision letter(s). The following individuals involved in review of your submission have agreed to reveal their identity: Kelly Ishida (Reviewer #2)*

### Transaction Report:

(Note: With the exception of the correction of typographical or spelling errors that could be a source of ambiguity, letters and reports are not edited. The original formatting of letters and referee reports may not be reflected in this compilation.)

**DOI:** <https://doi.org/10.1128/spectrum.03526-23>

Re: Spectrum03526-23 (Upc2-mediated mechanisms of azole resistance in *Candida auris*)

Dear Prof. Frederic Lamoth:

Thank you for the privilege of reviewing your work. Below you will find my comments, instructions from the Spectrum editorial office, and the reviewer comments.

Please return the manuscript within 60 days; if you cannot complete the modification within this time period, please contact me. If you do not wish to modify the manuscript and prefer to submit it to another journal, notify me immediately so that the manuscript may be formally withdrawn from consideration by Spectrum.

### Revision Guidelines

To submit your modified manuscript, log into the submission site at <https://spectrum.msubmit.net/cgi-bin/main.plex>. Go to Author Tasks and click the appropriate manuscript title to begin. The information you entered when you first submitted the paper will be displayed; update this as necessary. Note the following requirements:

- Upload point-by-point responses to the issues raised by the reviewers in a file named "Response to Reviewers," NOT IN YOUR COVER LETTER
- Upload a compare copy of the manuscript (without figures) as a "Marked-Up Manuscript" file
- Upload a clean .DOC/.DOCX version of the revised manuscript and remove the previous version
- Each figure must be uploaded as a separate, editable, high-resolution file (TIFF or EPS preferred), and any multipanel figures must be assembled into one file
- Any [supplemental material](#) intended for posting by ASM should be uploaded separate from the main manuscript; you can combine all supplemental material into one file (preferred) or split it into a maximum of 10 files, with all associated legends included

For complete guidelines on revision requirements, see our [Submission and Review Process](#) webpage. Submission of a paper that does not conform to guidelines may delay acceptance of your manuscript.

**Data availability:** ASM policy requires that data be available to the public upon online posting of the article, so please verify all links to sequence records, if present, and make sure that each number retrieves the full record of the data. If a new accession number is not linked or a link is broken, provide Spectrum production staff with the correct URL for the record. If the accession numbers for new data are not publicly accessible before the expected online posting of the article, publication may be delayed; please contact production staff ([Spectrum@asmusa.org](mailto:Spectrum@asmusa.org)) immediately with the expected release date.

**Publication Fees:** For information on publication fees and which article types are subject to charges, visit our [website](#). If your manuscript is accepted for publication and any fees apply, you will be contacted separately about payment during the production process; please follow the instructions in that e-mail. Arrangements for payment must be made before your article is published.

**ASM Membership:** Corresponding authors may [join or renew ASM membership](#) to obtain discounts on publication fees. Need to upgrade your membership level? Please contact Customer Service at [Service@asmusa.org](mailto:Service@asmusa.org).

The ASM Journals program strives for constant improvement in our submission and publication process. Please tell us how we can improve your experience by taking this quick [Author Survey](#).

Thank you for submitting your paper to Spectrum.

Sincerely,  
Dimitrios Kontoyiannis  
Editor  
Microbiology Spectrum

Reviewer #1 (Comments for the Author):

This is a strong manuscript that characterizes the role of Upc2 in *C. auris* azole susceptibility. The data strongly support the conclusions and add interesting observations that make important extensions to what has been observed for the homologous TF in other *Candida* spp. I have only a few suggestions that could improve the manuscript.

1. It would be nice to use the HA tag of the hyperactive Upc2 to confirm that protein levels are also increased.
2. The statistical tests need to be corrected for multiple comparisons. I do not think this will affect the results but it needs to be

corrected to maintain rigor.

3. A figure to summarize the interactions of Upc2 might make the discussion a little more straightforward for the reader, particularly those not familiar with the azole field.

4. Line 42. Azoles are not a first line therapy for any candida spp. causing invasive disease according to IDSA and European guidelines. This is because of the likelihood of resistance and the fact that echinocandins are more effective clinically.

Reviewer #2 (Comments for the Author):

The manuscript provides interesting and meaningful results about the role of transcription factor Upc2 on azole resistance mechanisms in *Candida auris*, that 90-100 clinical isolates are fluconazole resistant.

The manuscript is well written and easy to read and interpret the results.

Minor comments:

insert the statistical test used in the captions.

In the figures, try changing the arrows by other symbols that indicate the differences between the compared strains. It's confusing.

## MS Spectrum 03526-23: responses to reviewers

Reviewer #1 (Comments for the Author):

This is a strong manuscript that characterizes the role of Upc2 in *C. auris* azole susceptibility. The data strongly support the conclusions and add interesting observations that make important extensions to what has been observed for the homologous TF in other *Candida* spp. I have only a few suggestions that could improve the manuscript.

1. It would be nice to use the HA tag of the hyperactive Upc2 to confirm that protein levels are also increased.

**Response: We fully agree that demonstration of the hyperactivation of Upc2 at the protein level would strengthen the manuscript. We have performed a Western blot, which indicates the protein levels of Upc2, Mrr1 and Tac1 in the UPC2<sup>HA</sup>, MRR1<sup>HA</sup> and TAC1b<sup>HA</sup> strains, respectively. See additional text in the results and methods section (lines 81-82 and 341-350) and new Supplementary Figure 5.**

2. The statistical tests need to be corrected for multiple comparisons. I do not think this will affect the results but it needs to be corrected to maintain rigor.

**Response: We are sorry, but we do not understand the request of the reviewer. We have performed RT-PCR experiments in biological triplicates and technical duplicates, as mentioned in the method section (lines 372). Comparison were performed using the t test (lines 377). We have experience with RT-PCR and we have always published our results using this statistical approach (see our previous publications). This is also the standard approach used in other publications reporting RT-PCR experiments. To our knowledge, tests for multiple comparisons are applied when multiple variables are tested on a same sampling, which is not the case here. Results in the Figures 1, 2 and 3 show individual comparisons for only two conditions. This has been clarified in the figure legends**

3. A figure to summarize the interactions of Upc2 might make the discussion a little more straightforward for the reader, particularly those not familiar with the azole field.

**Response: we agree with this proposition. We have added a Figure 4 with a schematic representation of Upc2 function in *Candida auris*. We have added a sentence at the beginning of the discussion section to introduce this new figure (lines 167-170).**

4. Line 42. Azoles are not a first line therapy for any *Candida* spp. causing invasive disease according to IDSA and European guidelines. This is because of the likelihood of resistance and the fact that echinocandins are more effective clinically.

**Response: We agree and we have modified this sentence in the abstract and in the introduction (line 5-7 and 42-45).**

Reviewer #2 (Comments for the Author):

The manuscript provides interesting and meaningful results about the role of transcription factor Upc2 on azole resistance mechanisms in *Candida auris*, that 90-100 clinical isolates are fluconazole resistant.

The manuscript is well written and easy to read and interpret the results.

Minor comments:

insert the statistical test used in the captions.

**Response: We have added a mention of the statistical test in the figure legend.**

In the figures, try changing the arrows by other symbols that indicate the differences between the compared strains. It's confusing.

**Response: We have substituted the arrows by brackets to clearly show which columns are compared (also indicated in the figure legend).**

Re: Spectrum03526-23R1 (Up2-mediated mechanisms of azole resistance in *Candida auris*)

Dear Prof. Frederic Lamoth:

Your manuscript has been accepted, and I am forwarding it to the ASM production staff for publication. Your paper will first be checked to make sure all elements meet the technical requirements. ASM staff will contact you if anything needs to be revised before copyediting and production can begin. Otherwise, you will be notified when your proofs are ready to be viewed.

**Data Availability:** ASM policy requires that data be available to the public upon online posting of the article, so please verify all links to sequence records, if present, and make sure that each number retrieves the full record of the data. If a new accession number is not linked or a link is broken, provide production staff with the correct URL for the record. If the accession numbers for new data are not publicly accessible before the expected online posting of the article, publication may be delayed; please contact ASM production staff immediately with the expected release date.

**Publication Fees:** For information on publication fees and which article types have charges, please visit our [website](#). We have partnered with Copyright Clearance Center (CCC) to collect author charges. If fees apply to your paper, you will receive a message from no-reply@copyright.com with further instructions. For questions related to paying charges through RightsLink, please contact CCC at ASM\_Support@copyright.com or toll free at +1-877-622-5543. CCC makes every attempt to respond to all emails within 24 hours.

**ASM Membership:** Corresponding authors may [join or renew ASM membership](#) to obtain discounts on publication fees. Need to upgrade your membership level? Please contact Customer Service at Service@asmusa.org.

**PubMed Central:** ASM deposits all Spectrum articles in PubMed Central and international PubMed Central-like repositories immediately after publication. Thus, your article is automatically in compliance with the NIH access mandate. If your work was supported by a funding agency that has public access requirements like those of the NIH (e.g., the Wellcome Trust), you may post your article in a similar public access site, but we ask that you specify that the release date be no earlier than the date of publication on the Spectrum website.

**Embargo Policy:** A press release may be issued as soon as the manuscript is posted on the [Spectrum Latest Articles webpage](#). The corresponding author will receive an email with the subject line "ASM Journals Author Services Notification" when the article is available online.

The ASM Journals program strives for constant improvement in our submission and publication process. Please tell us how we can improve your experience by taking this quick [Author Survey](#).

Thank you for submitting your paper to Spectrum.

Sincerely,  
Dimitrios Kontoyiannis  
Editor  
Microbiology Spectrum
