# Supplementary material for: Upc2-mediated mechanisms of azole resistance in Candida auris
Source: PubMed Central journal article supplement (PMC10845950; doi:10.1128/spectrum.03526-23), 2024-01-11
Supplement: spectrum.03526-23-s0001.pdf [file spectrum.03526-23-s0001.pdf]

## **Upc2-mediated mechanisms of azole resistance in *Candida auris***

Jizhou LI<sup>1,2†</sup>, Lola AUBRY<sup>1†</sup>, Danielle BRANDALISE<sup>1</sup>, Alix T. COSTE<sup>1</sup>, Dominique SANGULARD<sup>1</sup>, Frederic LAMOTH<sup>1,2</sup>

<sup>1</sup> Institute of Microbiology, Lausanne University Hospital and University of Lausanne, Lausanne, Switzerland

<sup>2</sup> Infectious Diseases Service, Department of Medicine, Lausanne University Hospital and University of Lausanne, Lausanne, Switzerland

† These authors equally contributed to the work.

### **Supplementary Material**

**Supplementary Table 1: Plasmids used in this study**

| <b>Name</b>                          | <b>Description</b>                                                                                                | <b>Reference</b> |
|--------------------------------------|-------------------------------------------------------------------------------------------------------------------|------------------|
| pJK795                               | <i>NatR</i> selection marker for nourseothricin                                                                   | (26)             |
| pYM70                                | <i>HygR</i> selection marker for hygromycin                                                                       | (27)             |
| Clp-pACT1-3xFLAG-MNase-SV40-CYC-SAT1 | <i>CauNi</i> and SAT1 selection marker for hygromycin                                                             | (28)             |
| pjli6                                | $P_{ADH1}$ , <i>CauNi</i> and <i>SAT1</i> selection marker for nourseothricin                                     | This study       |
| pjli7                                | $P_{ADH1}$ , <i>MRR1-3XHA</i> Tag, <i>CauNi</i> and <i>SAT1</i> selection marker for nourseothricin               | This study       |
| pjli8                                | $P_{ADH1}$ , <i>MRR1-3XHA</i> Tag, $T_{ACT1}$ , <i>CauNi</i> and <i>SAT1</i> selection marker for nourseothricin  | This study       |
| pjli11                               | $P_{ADH1}$ , <i>TAC1b-3XHA</i> Tag, $T_{ACT1}$ , <i>CauNi</i> and <i>SAT1</i> selection marker for nourseothricin | This study       |
| pjli12                               | $P_{ADH1}$ , <i>UPC2-3XHA</i> Tag, $T_{ACT1}$ , <i>CauNi</i> and <i>SAT1</i> selection marker for nourseothricin  | This study       |

**Supplementary Table 2: Primers and RNAs guides used in this study**

| <b>Primer</b>                  | <b>Aim</b>                                                                                                                                                      | <b>Sequence (5' → 3')</b>                                                                                                                  |
|--------------------------------|-----------------------------------------------------------------------------------------------------------------------------------------------------------------|--------------------------------------------------------------------------------------------------------------------------------------------|
| ADH1p_PF_KpnI                  | <i>ADH1</i> promotor amplification containing KpnI restriction site to clone pJli6                                                                              | ACACTGGTACCCGAGATAGATCGAAATACGCTC                                                                                                          |
| ADH1p_PR_KasI_NheI             | <i>ADH1</i> promotor amplification containing NheI restriction site to clone pJli6                                                                              | ACACTGCTAGCGGCCCGATTTCGTGAAGATTGATTGATGATG                                                                                                 |
| MRR1_PF_KasI                   | <i>MRR1</i> amplification containing KasI restriction site to clone pJli7                                                                                       | ACACTGGCGCCATGGTATCTTCGAAAGATC TGGC                                                                                                        |
| MRR1_PR_BsrGI_Tag_CS_NruI_NheI | <i>MRR1</i> amplification containing BsrGI restriction site, the 3xHA Tag sequence, codon stop of <i>MRR1</i> , and NruI, NheI restriction sites to clone pJli7 | ACACTGCTAGCTCGCGATTAAGCGTAATCCGGAACATCGTATGGGTAAGCGT<br>AATCCGGAACATCGTATGGGTAAGCGTAATCCGGAACATCGTATGGGTATGT<br>ACACACATCAAGCATCTCTTCGAATG |
| ACT1t_PF_NheI                  | <i>ACT1</i> terminator amplification containing NheI restriction site to clone pJli8                                                                            | ACACTGCTAGCTCTCTCAAAGATGGTTAGTATTCTTGC                                                                                                     |
| ACT1t_PR_NheI                  | <i>ACT1</i> terminator amplification containing NheI restriction site to clone pJli8                                                                            | ACACTGCTAGCGAGTGACTGCTGGGTAGTAG                                                                                                            |
| TAC1b_PF_KasI                  | <i>TAC1b</i> amplification containing KasI restriction site to clone pJli11                                                                                     | ACA CTG GCG CCA TGA GTG CAG TGG TGA AGG G                                                                                                  |

|                |                                                                                                             |                                        |
|----------------|-------------------------------------------------------------------------------------------------------------|----------------------------------------|
| TAC1b_PR_BsrGI | <i>TAC1b</i> amplification containing BsrGI restriction site to clone pJli11                                | ACACTTGTACAAAGCCCATTATCGAAGAAG AAATTAG |
| UPC2_PF_KasI   | <i>UPC2</i> amplification containing KasI restriction site to clone pJli12                                  | ACACTGGCGCCATGTCTATGAAAGAAGAGC AACAGC  |
| UPC2_PR_BsrGI  | <i>UPC2</i> amplification containing BsrGI restriction site to clone pJli12                                 | ACACTTGTACAAATATCGTTAGACCCAATGAACCC    |
| pJli8_ADH1_PF  | pJli8, pJli11 and pJli12 sequencing / <i>TAC1b</i> , <i>MRR1</i> , <i>UPC2</i> hyperactivation verification | AGCAACACCGGTGGAATTTCC                  |
| MRR1_PrimerF2  | pJli8 sequencing                                                                                            | GCTAAGCAGATGTTTCGATGCG                 |
| MRR1_PrimerF3  | pJli8 sequencing                                                                                            | CTCATCCATTTCTGGGAAGCC                  |
| MRR1_PrimerF4  | pJli8 sequencing                                                                                            | GAATAAGCATACTTTGTCCTTGGG               |
| MRR1_PrimerF5  | pJli8 sequencing                                                                                            | TACGTCTTTATCACACTTATGCTCC              |
| MRR1_PrimerF6  | pJli8 sequencing / <i>MRR1</i> deletion verification                                                        | ATCTTTCACTCAAGACATTTTTGATCTC           |
| MRR1_PrimerF7  | pJli8 sequencing                                                                                            | AAGTCAAGGAGTTGGTAACCATTTG              |

|                |                                                          |                            |
|----------------|----------------------------------------------------------|----------------------------|
| TAC1_PrimerF2  | pjli11 sequencing                                        | AGCTGAGTCTCCAGGAAACTG      |
| TAC1_PrimerF3  | pjli11 sequencing                                        | GAAGCAGTACAAGTTTTTGAAGCTCG |
| TAC1_PrimerF4  | pjli11 sequencing                                        | GCTGGTAAACATCGTCGACG       |
| TAC1_PrimerF5  | pjli11 sequencing                                        | CTTCGCCATGAACTGGATAATTAC   |
| TAC1_PrimerF6  | pjli11 sequencing                                        | AAGAATGACCCTACACTTTCCAAC   |
| UPC2_Pf2       | pjli12 sequencing                                        | CCGCCACCTAACCTATCAAAC      |
| UPC2_Pf3       | pjli12 sequencing / <i>UPC2</i><br>deletion verification | GCCAGGTTTCCAACACGATTAC     |
| UPC2_Pf4       | pjli12 sequencing                                        | GCTGAAGTCATTTGCTGATCTCG    |
| CauNi_verif_Pf | <i>TAC1b, MRR1, UPC2</i><br>hyperactivation verification | TGGCCTCTTGATAAGGGCTG       |
| sat1_verif_PR  | <i>TAC1b, MRR1, UPC2</i><br>hyperactivation verification | GAGACTGTGCGCGACTCC         |
| pjli8_ACT1t_PR | <i>TAC1b, MRR1, UPC2</i><br>hyperactivation verification | GTACGCTAAAGGGTCATGAGC      |
| UPC2_del_Pf1   | Construction of <i>UPC2</i> deletion<br>cassette         | CTATCCGTGATAGCTAAGTCGG     |

|                     |                                               |                                                   |
|---------------------|-----------------------------------------------|---------------------------------------------------|
| UPC2_del_PR1        | Construction of <i>UPC2</i> deletion cassette | GTATTCTGGGCCTCCATGTCCTCGGGAGAGTTGAATCCTC          |
| UPC2_del_PF2        | Construction of <i>UPC2</i> deletion cassette | GAGGATTCAACTCTCCCGAGGACATGGAGGCCCAAGAATAC         |
| UPC2_del_PR2        | Construction of <i>UPC2</i> deletion cassette | CCTTCACTACTAACTCTTCACACTCAGTATAGCGACCAGCATTAC     |
| UPC2_del_PF3        | Construction of <i>UPC2</i> deletion cassette | GTGAATGCTGGTCGCTATACTGAGTGTGAA GAGTTAGTAGTGAAGG   |
| UPC2_del_PR3        | Construction of <i>UPC2</i> deletion cassette | AGAGGGGTTGCAAAGGAGAG                              |
| UPC2_del_PF4        | Construction of <i>UPC2</i> deletion cassette | CATGCAGGTGTAGGTTACGAAAG                           |
| UPC2_del_PR4        | Construction of <i>UPC2</i> deletion cassette | TCGTGGTGGAGATTCTCATGG                             |
| UPC2_del_PR1(hygro) | Construction of <i>UPC2</i> deletion cassette | TATCGAACAGCAAGCACTATACCTCGGGAG AGTTGAATCCTC       |
| UPC2_del_PF2(hygro) | Construction of <i>UPC2</i> deletion cassette | GAGGATTCAACTCTCCCGAGGTATAGTGCT TGCTGTTGATA        |
| UPC2_del_PR2(hygro) | Construction of <i>UPC2</i> deletion cassette | CTTCACTACTAACTCTTCACACTATTTTATGATGGAATGAATGGGATG  |
| UPC2_del_PF3(hygro) | Construction of <i>UPC2</i> deletion cassette | CATCCCATTCAATTCCATCATAAAATAGTGTGAAGAGTTAGTAGTGAAG |
| NAT1_743_F          | <i>UPC2</i> deletion verification             | AGTTCTTCGTTTCACTGAGTATACG                         |
| UPC2_del_verif_PR   | <i>UPC2</i> deletion verification             | CGAGGTAGTGGGAAGGAGAAG                             |

|                    |                                               |                                                  |
|--------------------|-----------------------------------------------|--------------------------------------------------|
| F444Lverif_PF      | <i>UPC2, MRR1, MDR1</i> deletion verification | CCACCCAAGGCATTTCTATATC                           |
| MRR1del_PF1        | <i>MRR1</i> deletion                          | CGCTCCACTCTTAGAAAAATGGTC                         |
| MRR1del_PR1        | <i>MRR1</i> deletion                          | TATCGAACAGCAAGCACTATACGAGAAGTGTTAATTGCCGCT       |
| MRR1del_PF2        | <i>MRR1</i> deletion                          | AGCGGCAATTAACACTTCTCGTATAGTGCTTGCTGTTTCGATA      |
| MRR1del_PR2        | <i>MRR1</i> deletion                          | CGCATGTATATTTACGTAGTATGATTTTATGATGGAATGAATGGGATG |
| MRR1del_PF3        | <i>MRR1</i> deletion                          | CATCCCATTCCATCCATCATAAAATCATACTACGTAAATATACATGCC |
| MRR1del_PR3        | <i>MRR1</i> deletion                          | TTGGTCATAAACTCAATATCCCTCC                        |
| MRR1del_PF4        | <i>MRR1</i> deletion                          | GCATCTTCCATGACTAGACGC                            |
| MRR1del_PR4        | <i>MRR1</i> deletion                          | CATAGTCAGGTAGAGAGCCTTC                           |
| MRR1del_Verif_PR2  | <i>MRR1</i> deletion verification             | CACCAGATTGGAGTTCGGTAAG                           |
| MRR1_PrimerR2      | <i>MRR1</i> deletion verification             | TTGTGGGTGTTATCGGTGCC                             |
| MDR1del_PF1        | <i>MDR1</i> deletion                          | AAATAGGCAGGCGGGCAACG                             |
| MDR1del_PR1        | <i>MDR1</i> deletion                          | TATCGAACAGCAAGCACTATACGTGGAGATTGAAGATGCGTTG      |
| MDR1del_PF2        | <i>MDR1</i> deletion                          | CAACGCATCTTCAATCTCCACGTATAGTGCTTGCTGTTTCGATA     |
| MDR1del_PR2        | <i>MDR1</i> deletion                          | GATCAGGGCTACATCGTCTTATTTTATGATGGAATGAATGGGATG    |
| MDR1del_PF3        | <i>MDR1</i> deletion                          | CATCCCATTCCATCCATCATAAAATAAGACGATGTAGCCCTGATC    |
| MDR1del_PR3        | <i>MDR1</i> deletion                          | GGAGGTTTCATCCGCAAAAGC                            |
| MDR1del_PF4        | <i>MDR1</i> deletion                          | CCGGTGGTGGTTCACGTAAG                             |
| MDR1del_PR4        | <i>MDR1</i> deletion                          | CGGCTGCGAAAAGAGGTTCC                             |
| MDR1del_verif_PR   | <i>MDR1</i> deletion verification             | CGCTGCCAAAGTGCTAATATCC                           |
| MDR1_verif_PF      | <i>MDR1</i> deletion verification             | GTCTGTCAAGGCTGACTACC                             |
| ACT1_F             | <i>ACT1</i> RT_PCR                            | GAAGGAGATCACTGCTTTAGCC                           |
| ACT1_R             | <i>ACT1</i> RT_PCR                            | GAGCCACCAATCCACACAG                              |
| UPC2_PF(sybrgreen) | <i>UPC2</i> RT_PCR                            | AGGGTGTGTCACAGGTGTTG                             |

|                      |                                                                           |                       |
|----------------------|---------------------------------------------------------------------------|-----------------------|
| UPC2_PR(sybrgreen)   | <i>UPC2</i> RT_PCR                                                        | CGCCTCCAAGAAATCAAGC   |
| ERG11_PF(sybrgreen)  | <i>ERG11</i> RT_PCR                                                       | GTTTGCCTACGTGCAATTGG  |
| ERG11_PR(sybrgreen)  | <i>ERG11</i> RT_PCR                                                       | GTAGTCGACTGGTGGGAAGCG |
| TAC1b_PF(sybrgreen)  | <i>TAC1b</i> RT_PCR                                                       | AGAAGTGAACGCTCCTTCCG  |
| TAC1b_PR(sybrgreen)  | <i>TAC1b</i> RT_PCR                                                       | GGCGTGAATTCCTGTCTGTC  |
| CDR1_F               | <i>CDR1</i> RT_PCR                                                        | GAAATCTTGCACTTCCAGCCC |
| CDR1_R               | <i>CDR1</i> RT_PCR                                                        | CATCAAGCAAGTAGCCACCG  |
| MRR1_PF(sybrgreen)   | <i>MRR1</i> RT_PCR                                                        | TAGAGCCACTACCATCCGAC  |
| MRR1_PR(sybrgreen)   | <i>MRR1</i> RT_PCR                                                        | AGTTTGTGCCCTGCCTGATG  |
| MDR1_F               | <i>MDR1</i> RT_PCR                                                        | GAAGTATGATGGCGGGTG    |
| MDR1_R               | <i>MDR1</i> deletion<br>verification/ <i>MDR1</i> RT_PCR                  | CCCAAGAGAGACGAGCCC    |
| CauNi_sg5'           | Guide RNA for <i>TAC1b</i> , <i>MRR1</i> ,<br><i>UPC2</i> hyperactivation | CCCGGAGAUACACGGCGCCG  |
| CauNi_sg3'           | Guide RNA for <i>TAC1b</i> , <i>MRR1</i> ,<br><i>UPC2</i> hyperactivation | GCUGCAAAAUAAGGCCAGAG  |
| UPC2_del_sg5'        | Guide RNA for <i>UPC2</i> deletion                                        | AAUCUUCUGAGAAAAAGAGA  |
| UPC2_del_sg3'        | Guide RNA for <i>UPC2</i> deletion                                        | AGCAACUUGGACAUCAUGCA  |
| MRR1del_Guide_RNA_5' | Guide RNA for <i>MRR1</i> deletion                                        | UUGACGCGAGAGAAUUUGGA  |
| MRR1del_Guide_RNA_3' | Guide RNA for <i>MRR1</i> deletion                                        | ACGCCUGGAGAAUCACUAGA  |
| MDR1del_sg5'         | Guide RNA for <i>MDR1</i> deletion                                        | CAAAGUGUUCACAUACCCCG  |
| MDR1del_sg3'         | Guide RNA for <i>MDR1</i> deletion                                        | CCAGUAUUUAUUCUACCUCAA |



## Supplementary Figure 1

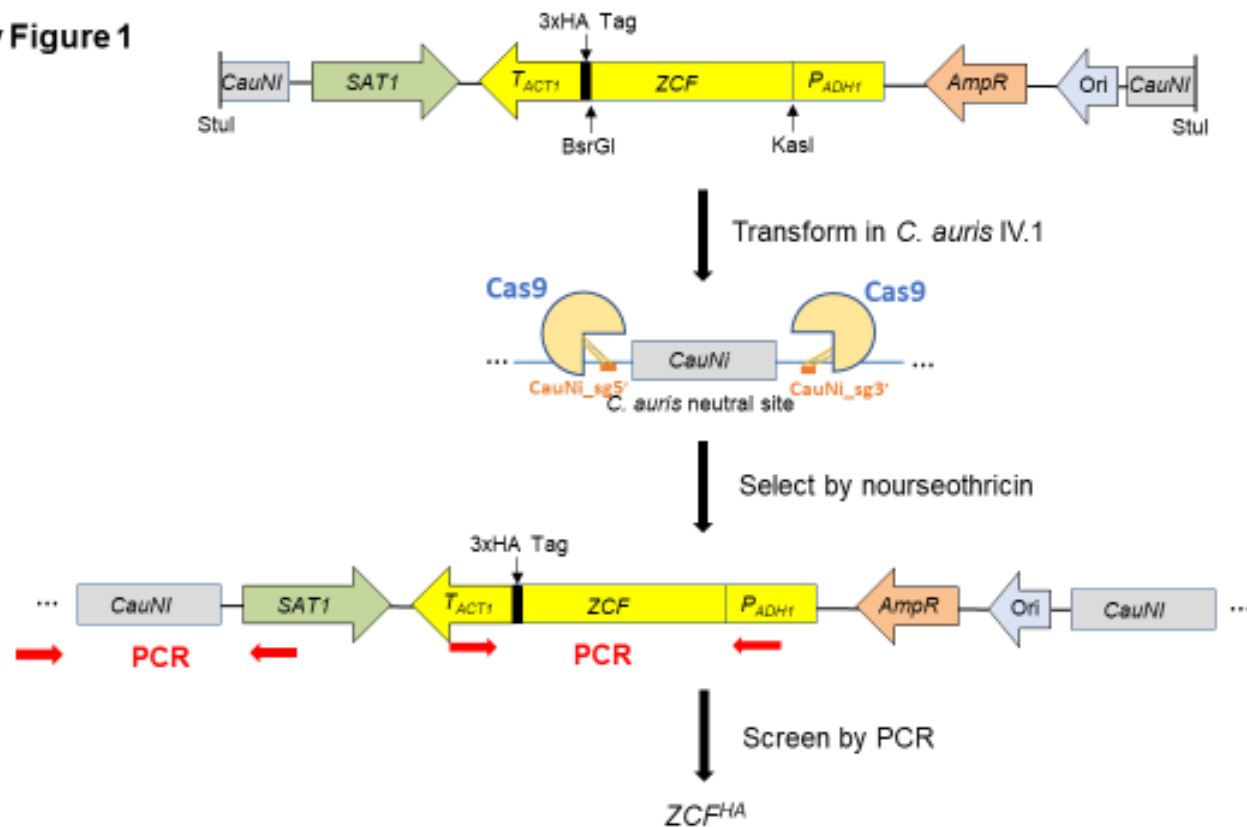

**Schematic view of the zinc cluster transcription factor (ZCF) hyperactivation system in *C. auris*.** The plasmid containing the promoter  $P_{ADH1}$ , the nucleotide sequence of ZCF fused by 3xHa Tag, the terminator of  $T_{ACT1}$ , the SAT1 cassette (nourseothricin resistance) and the *C. auris* neutral site *CauNI* was linearized by *StuI*. The restriction sites *KasI* and *BsrGI* were used to insert the ZCF nucleotide sequences. The linearized plasmid was transformed via electroporation in the wild-type IV.1 strain with CRISPR-Cas9 method, by targeting the upstream and the downstream regions of *CauNI* with the nucleotide-specific guide RNAs *CauNI\_sg5'* and *CauNI\_sg3'*.

## Supplementary Figure 2A

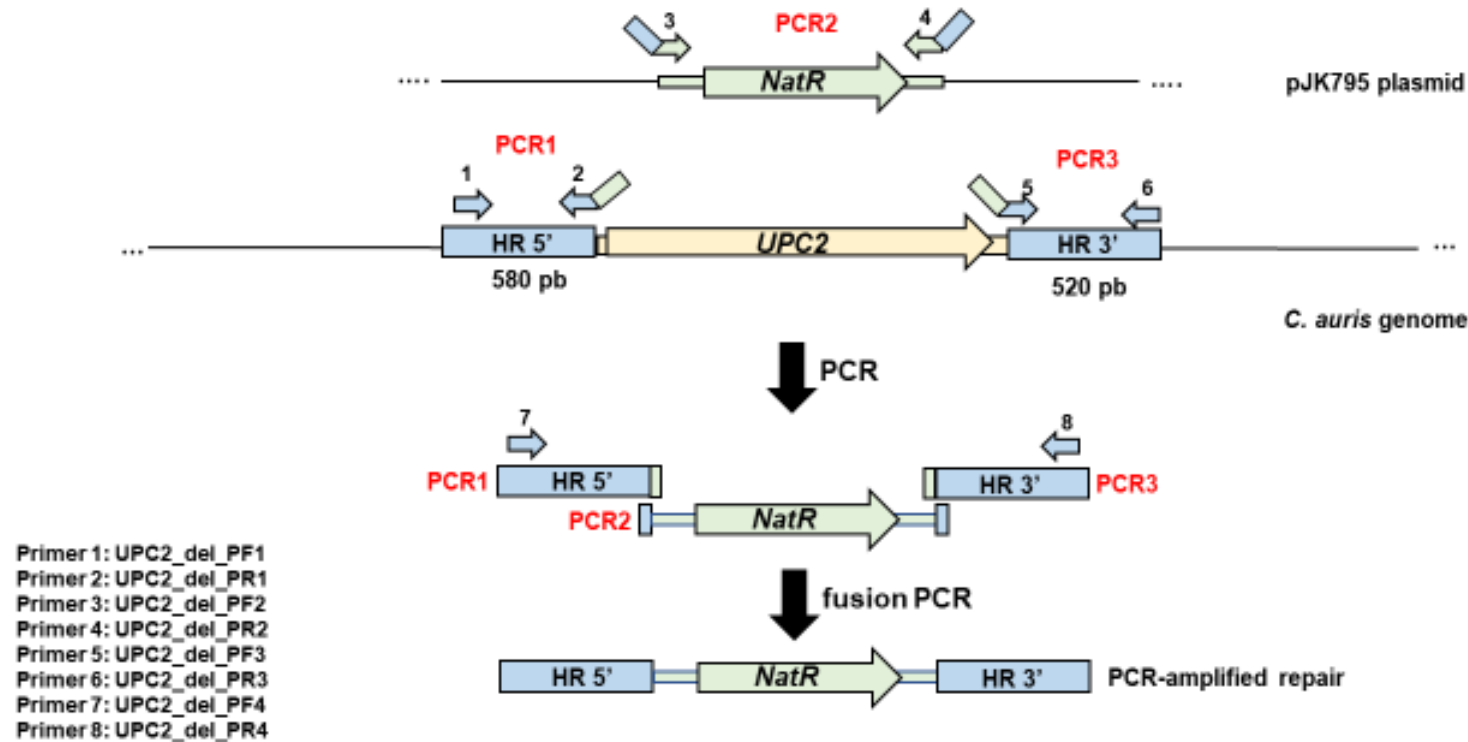

**Schematic view of the fusion PCRs for *UPC2* deletion in the IV.1 strain to generate the *upc2Δ* strain.** The fragment contains the *NatR* cassette (nourseothricin resistance) and 500 pb flanking sequences (HR 5' and HR 3') of *UPC2*. The fusion PCRs were carried out with overlapping primers as indicated. Primer 2 is reverse complemented to primer 3, and primer 4 is reverse complemented to primer 5.

Supplementary Figure 2B

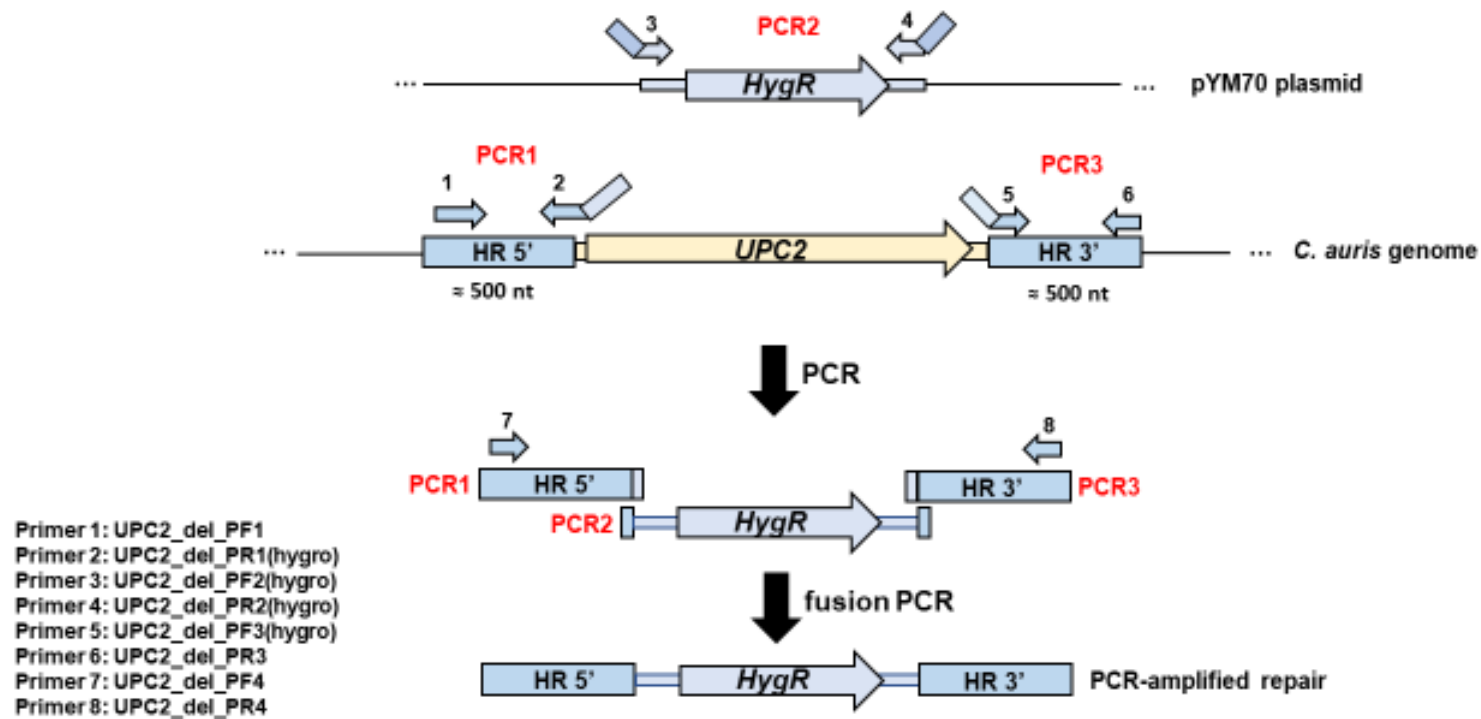

Schematic view of the fusion PCRs for *UPC2* deletion in the *TAC1b<sup>HA</sup>* and *MRR1<sup>HA</sup>* strains to generate the *TAC1b<sup>HA</sup>upc2Δ* and *MRR1<sup>HA</sup>upc2Δ* strains. The fragment contains the *HygR* cassette (hygromycin resistance) and 500 pb flanking sequences (HR 5' and HR 3') of *UPC2*. The fusion PCRs were carried out with overlapping primers as indicated. Primer 2 is reverse complemented to primer 3, and primer 4 is reverse complemented to primer 5.

### Supplementary Figure 3

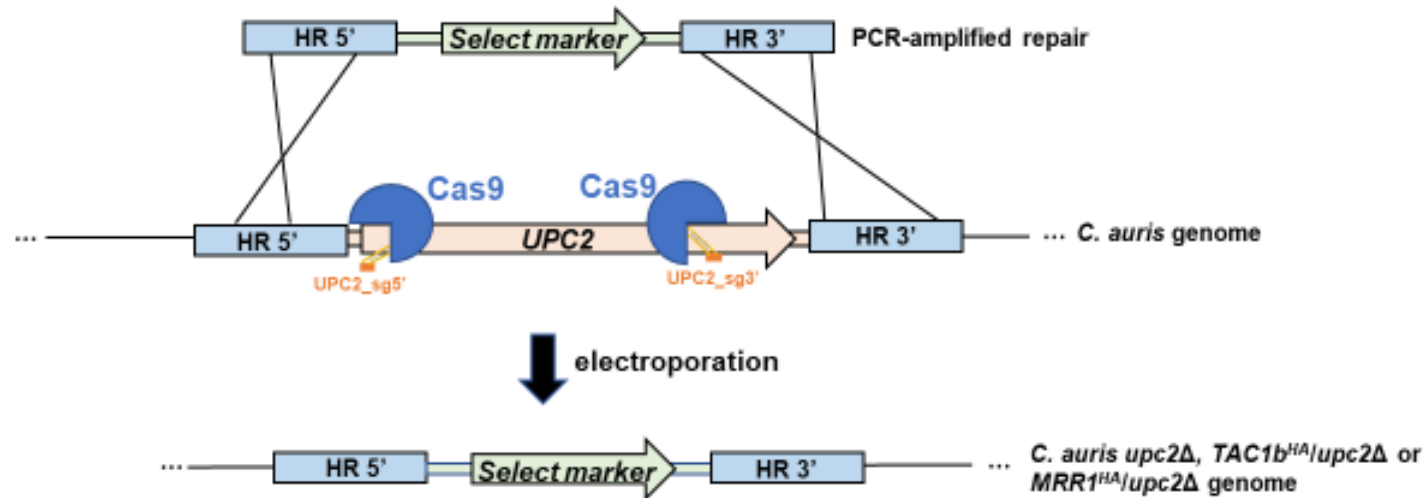

**Principle for CRISPR-Cas9-mediated deletion of *UPC2* in the IV.1, *TAC1b<sup>HA</sup>* and *MRR1<sup>HA</sup>* strains.** Two guide-RNAs were used: UPC2\_sg5' and UPC2\_sg3'. The selection markers *NatR* (nourseothricin resistance) and *HygR* (hygromycin resistance) were used for *UPC2* deletion in strain IV.1 and in strains *TAC1b<sup>HA</sup>* and *MRR1<sup>HA</sup>*, respectively.

### Supplementary Figure 4A

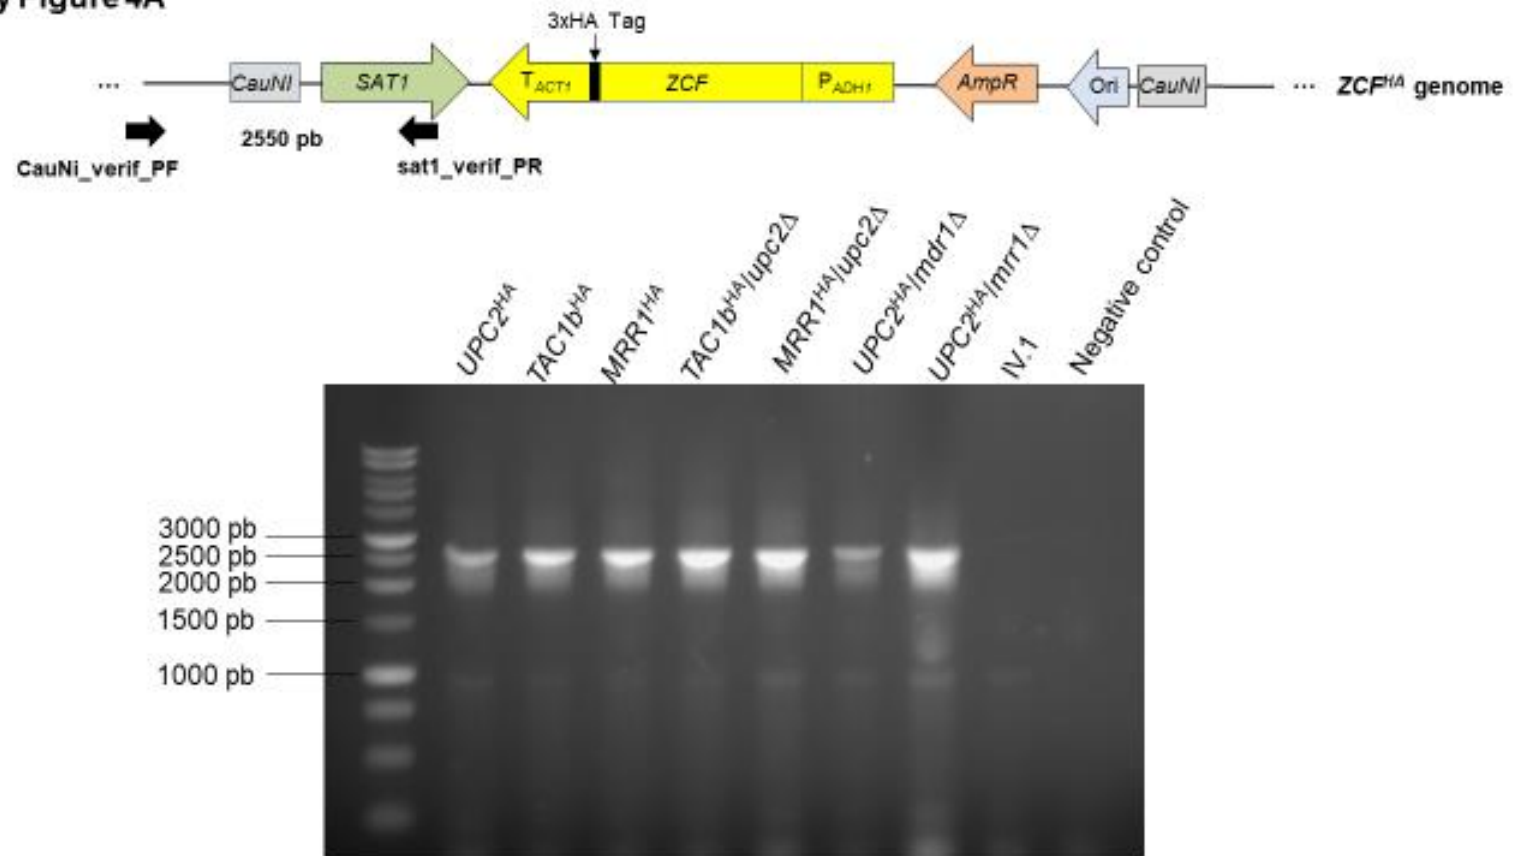

Verification of correct integration of the transformation cassette for zinc cluster transcription factor hyperactivation in the *UPC2<sup>HA</sup>*, *TAC1b<sup>HA</sup>*, *MRR1<sup>HA</sup>*, *TAC1b<sup>HA</sup>Δupc2Δ*, *MRR1<sup>HA</sup>Δupc2Δ*, *UPC2<sup>HA</sup>Δmdr1Δ* and *UPC2<sup>HA</sup>Δmrr1Δ* strains. An approximately 2.5 kb fragment was amplified with one primer in *SAT1* and another primer in the upstream region of the *C. auris* neutral site *CauNI*. As shown on the electrophoresis gel, the PCR product was present in the mutant strains and absent in the IV.1 strain.

### Supplementary Figure 4B

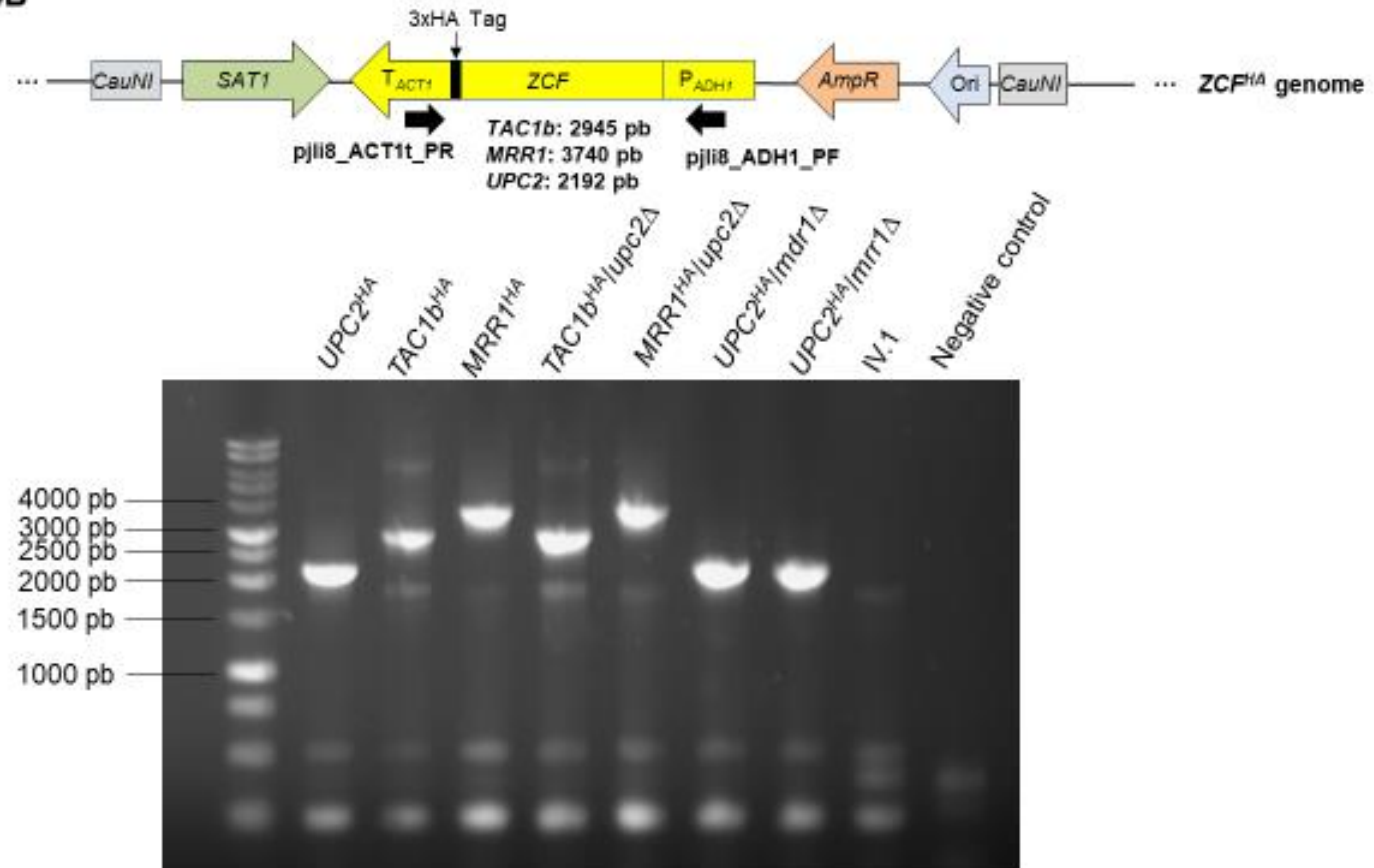

Verification of correct integration of the transformation cassette for zinc cluster transcription factor hyperactivation in the *UPC2<sup>HA</sup>*, *TAC1b<sup>HA</sup>*, *MRR1<sup>HA</sup>*, *TAC1b<sup>HA</sup>|upc2Δ*, *MRR1<sup>HA</sup>|upc2Δ*, *UPC2<sup>HA</sup>|mdr1Δ* and *UPC2<sup>HA</sup>|mrr1Δ* strains. A fragment was amplified with one primer in the promoter *P<sub>ADH1</sub>* and another primer in the terminator *T<sub>ACT1</sub>*. As shown on the electrophoresis gel, PCR products of different sizes (depending on the length of the target genes) were obtained in all the mutant strains.

## Supplementary Figure 5

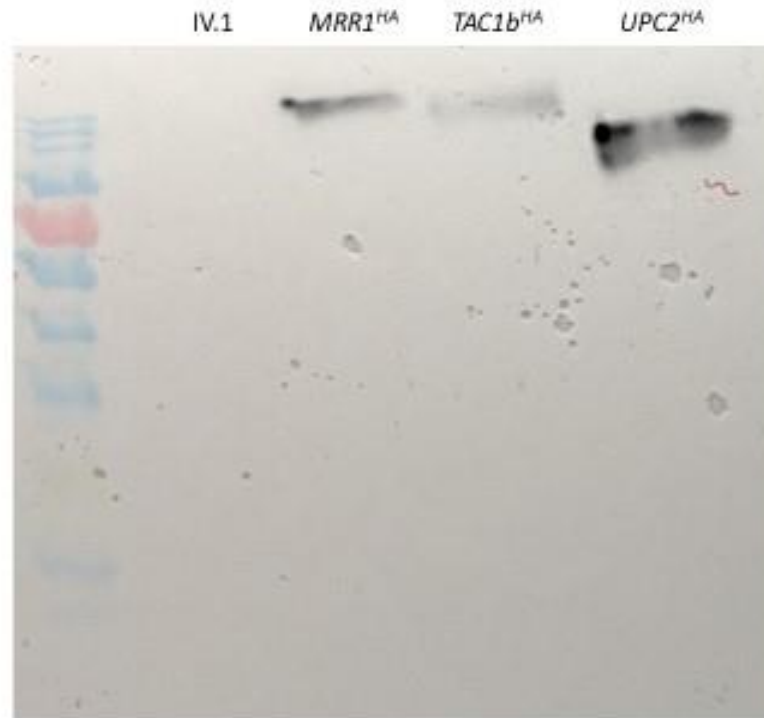

Verification of the HA tagging of Mrr1p, Tac1bp and Upc2p in the *MRR1<sup>HA</sup>*, *TAC1b<sup>HA</sup>* and *UPC2<sup>HA</sup>* strains, respectively. Western blot analysis using a HA tag monoclonal antibody showed the presence of detectable bands at the expected size: 129 kDa, 99 kDa and 67 kDa, in the *MRR1<sup>HA</sup>*, *TAC1b<sup>HA</sup>* and *UPC2<sup>HA</sup>* strains, respectively.

### Supplementary Figure 6A

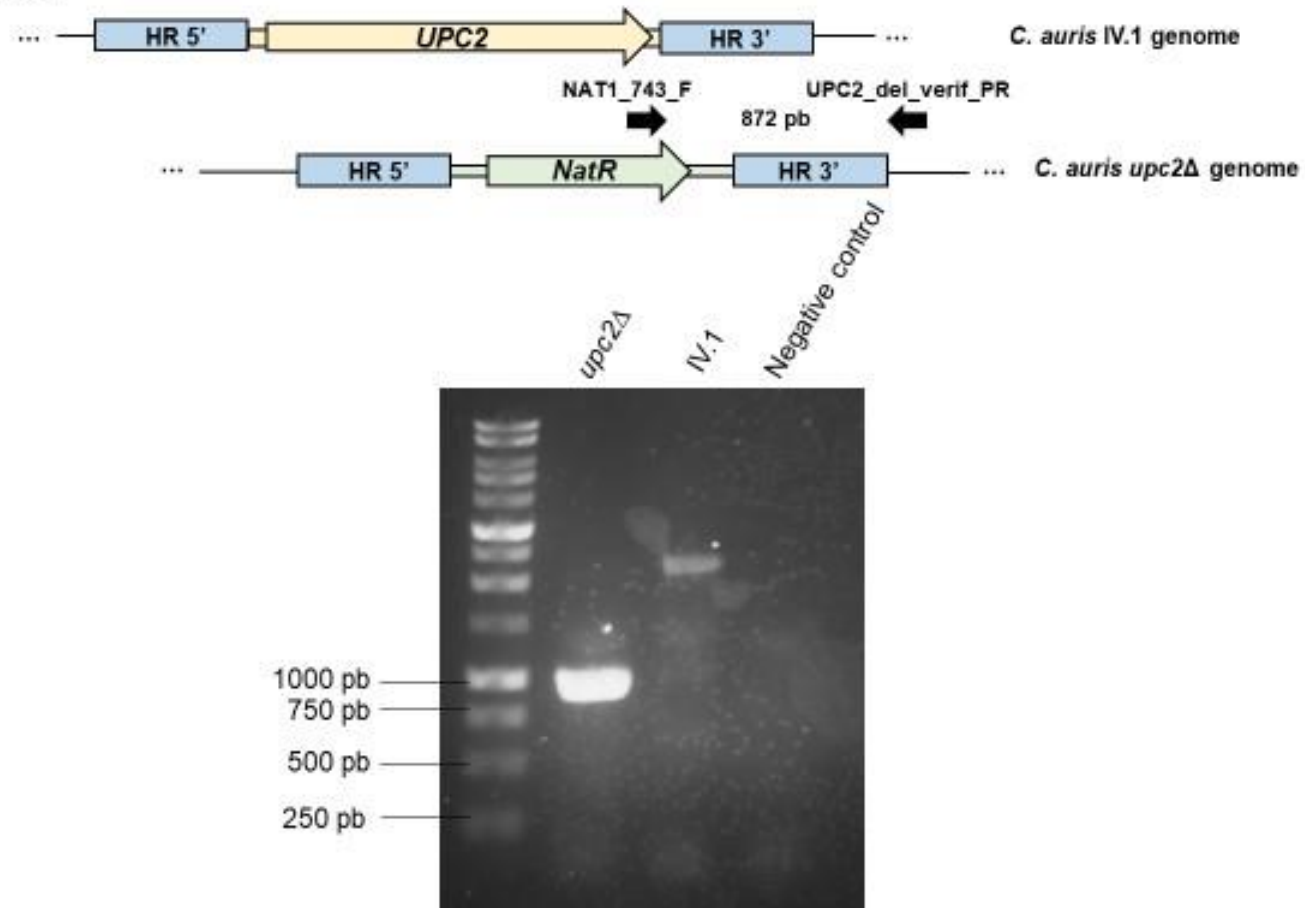

**Verification of the deletion of *UPC2* in the *upc2Δ* strain.** An approximately 900 pb fragment was amplified with one primer in *NatR* and another primer in the downstream region of HR 3'. As shown on the electrophoresis gel, the PCR product was present in the mutant strain and absent in the IV.1 strain.



Supplementary Figure 6B

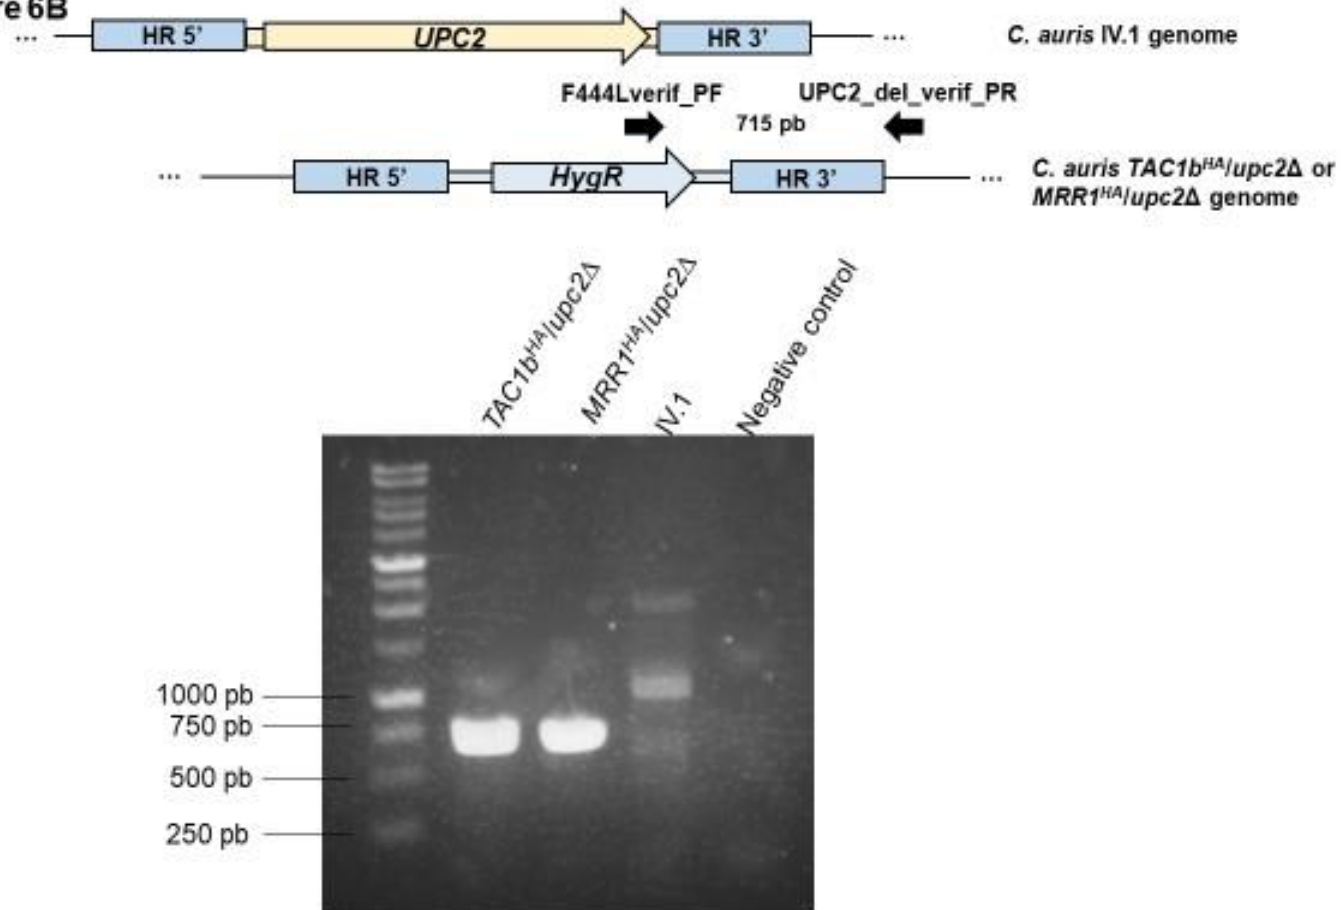

Verification of the deletion of *UPC2* in the *TAC1b<sup>HA</sup>upc2Δ* and *MRR1<sup>HA</sup>upc2Δ* strains. An approximately 700 pb fragment was amplified with one primer in *HygR* and another primer in the downstream region of HR 3'. As shown on the electrophoresis gel, the PCR product was present in the mutant strains and absent in the IV.1 strain.

### Supplementary Figure 6C

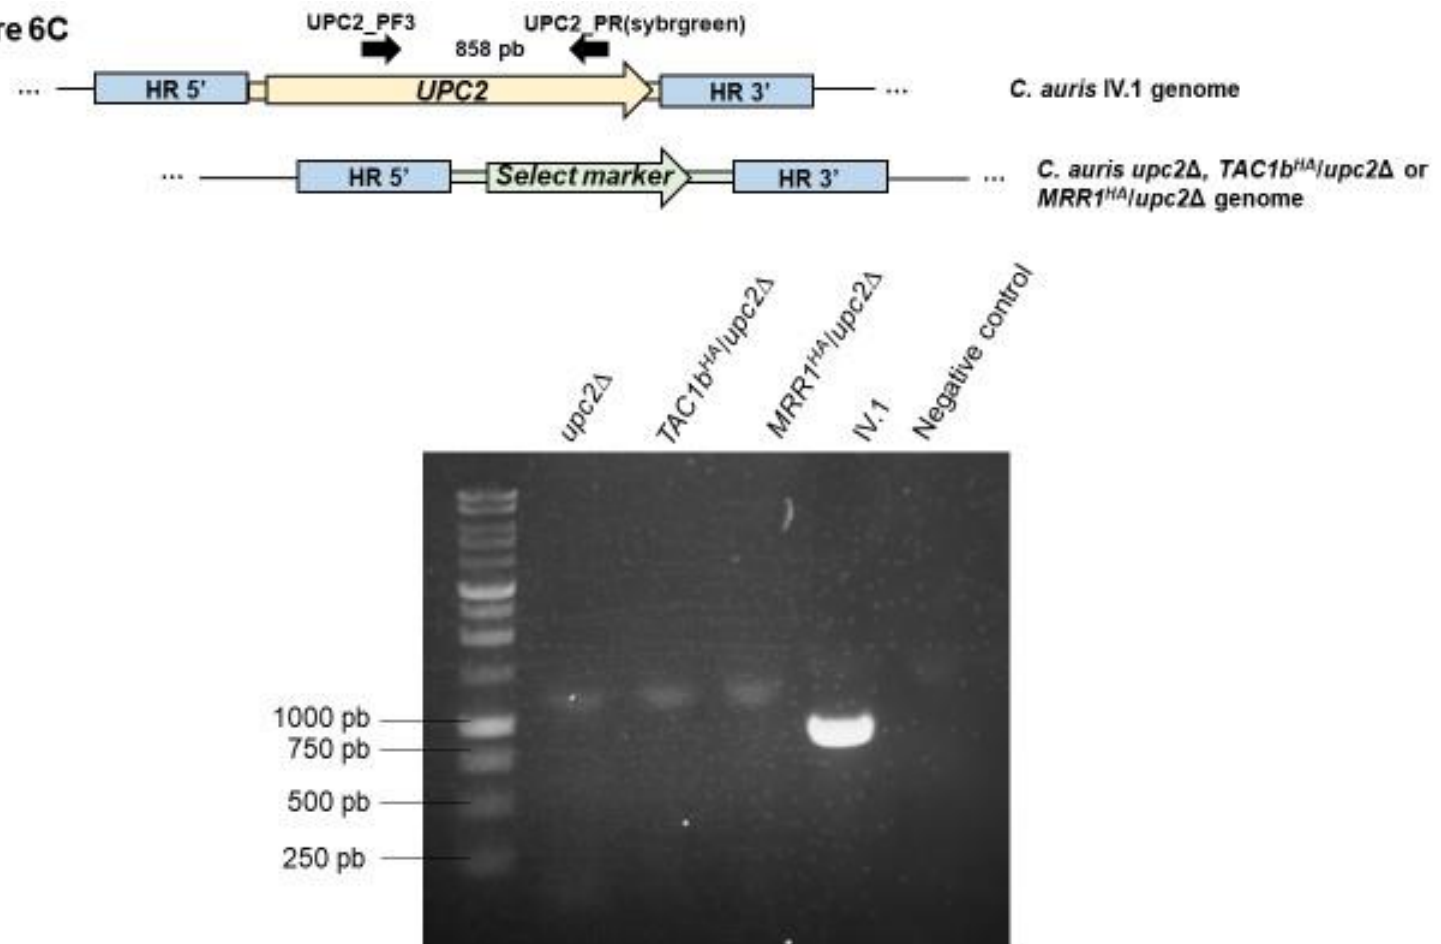

**Verification of the deletion of *UPC2* in the *upc2Δ*, *TAC1b<sup>HA</sup>upc2Δ* and *MRR1<sup>HA</sup>upc2Δ* strains.** An approximately 800 pb fragment was amplified with two primers located within *UPC2*. As shown on the electrophoresis gel, the PCR product was present in the IV.1 strain and absent in the mutant strains.

### Supplementary Figure 7A

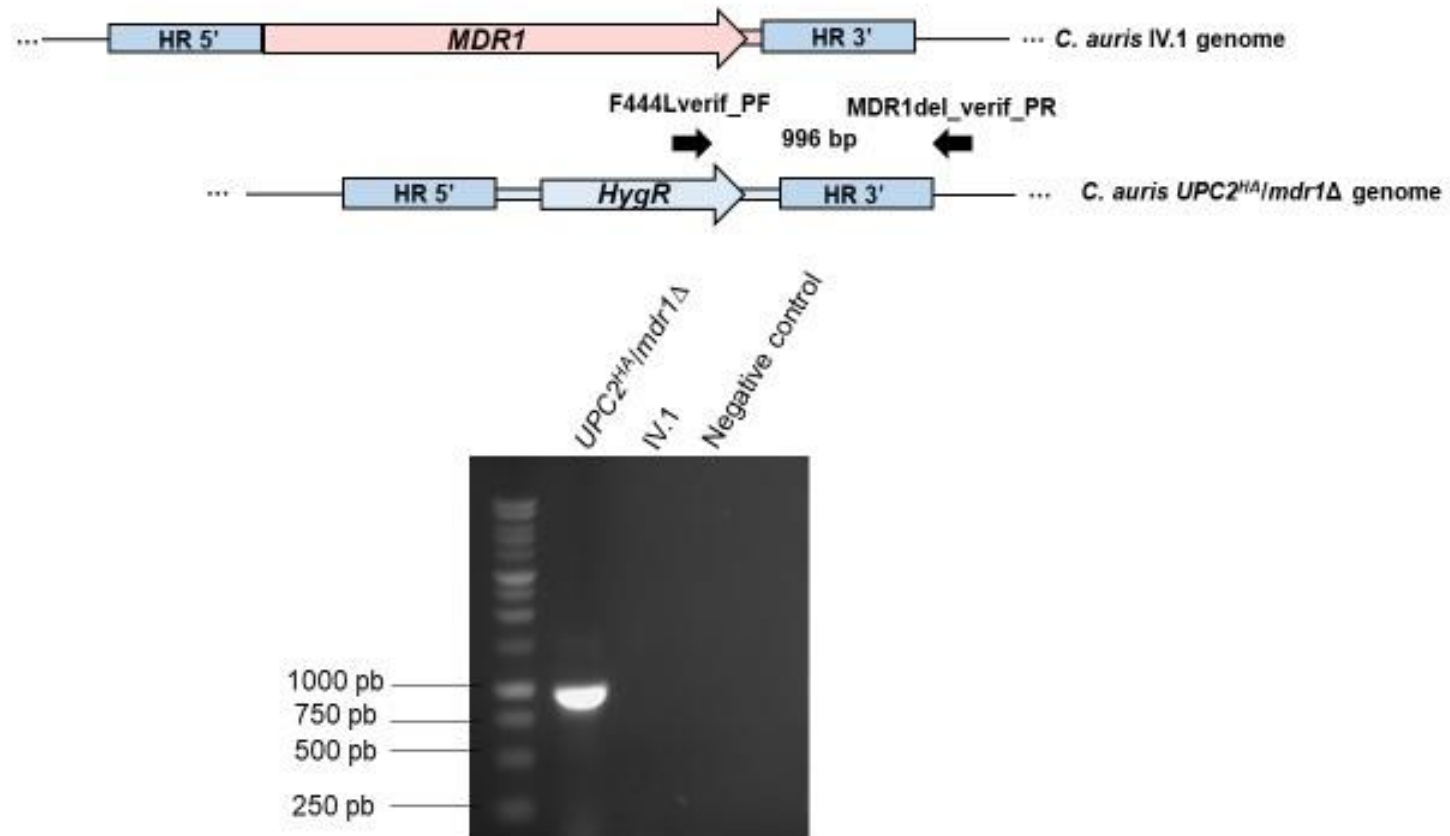

**Verification of the deletion of *MDR1* in the *UPC2<sup>HA</sup>mdr1Δ* strain.** An approximately 1 kb fragment was amplified with one primer in *HygR* and another primer in the downstream region of HR 3'. As shown on the electrophoresis gel, the PCR product was present in the mutant strain and absent in the IV.1 strain.

Supplementary Figure 7B

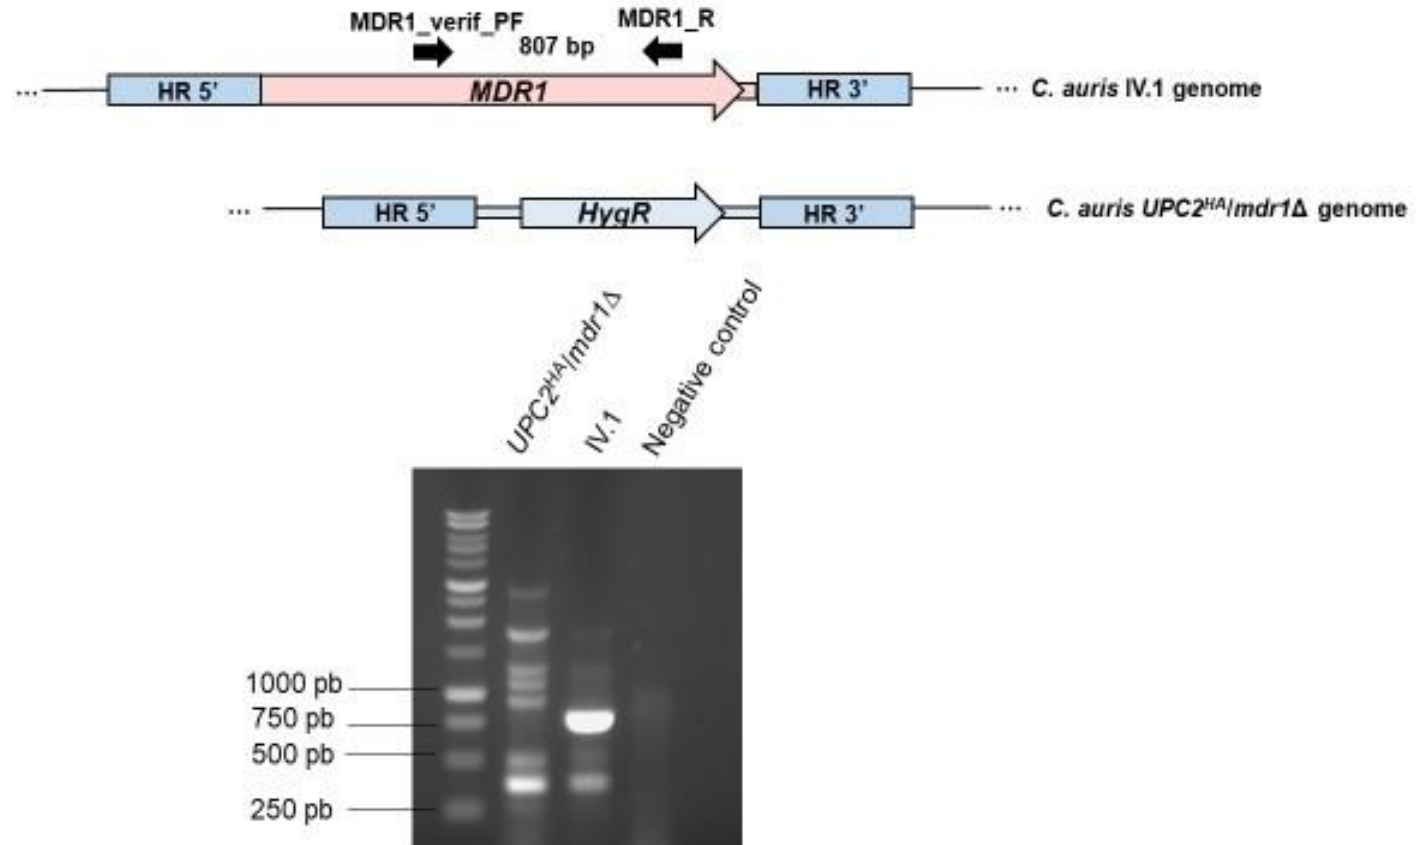

Verification of the deletion of *MDR1* in the *UPC2<sup>HA</sup>/mdr1Δ* strain. An approximately 800 pb fragment was amplified with two primers located within *MDR1*. As shown on the electrophoresis gel, the PCR product was present in the IV.1 strain and absent in the mutant strain.

### Supplementary Figure 8A

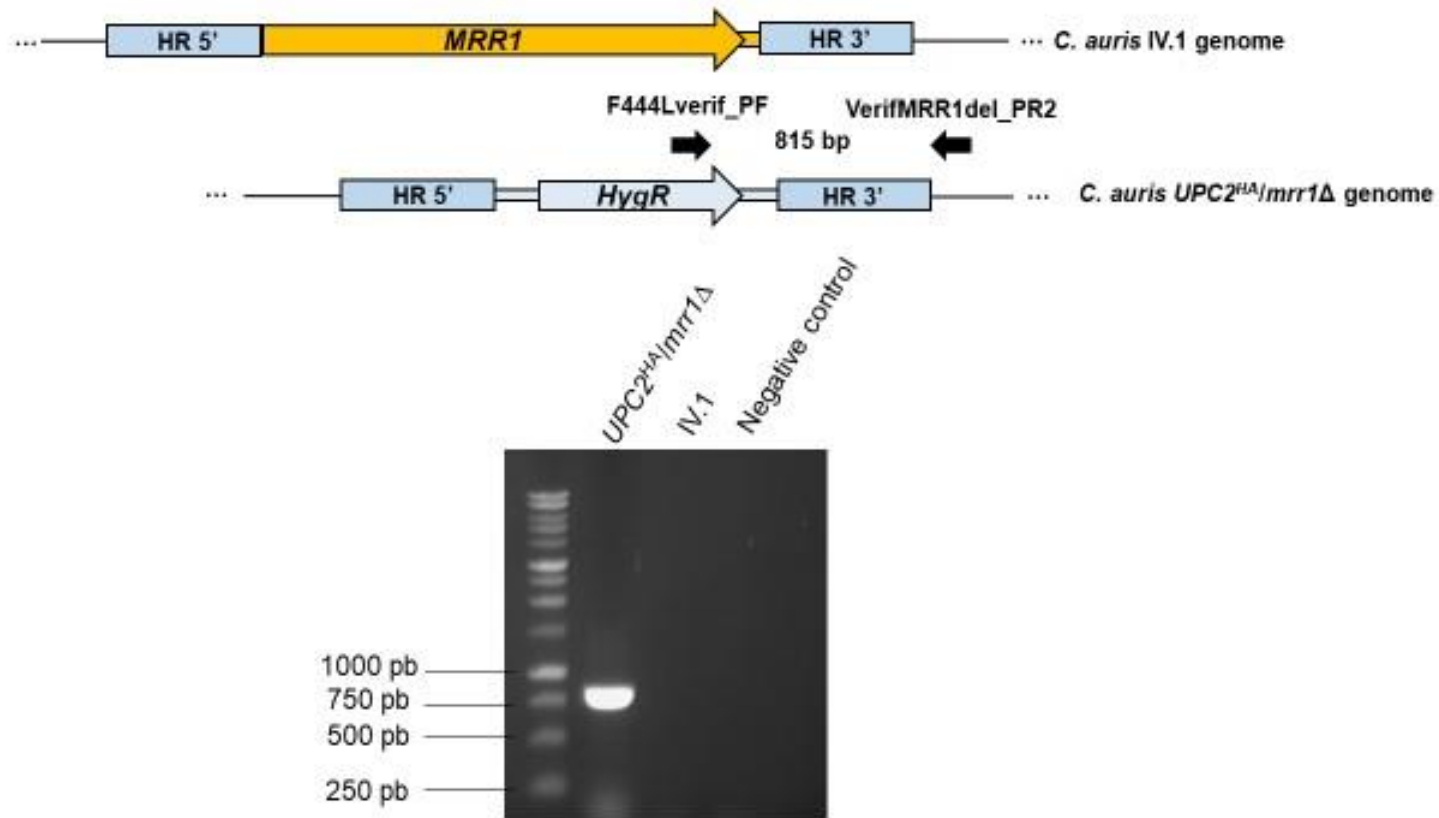

**Verification of the deletion of *MRR1* in the *UPC2<sup>HA</sup>/mrr1Δ* strain.** An approximately 800 pb fragment was amplified with one primer in *HygR* and another primer in the downstream region of HR 3'. As shown on the electrophoresis gel, the PCR product was present in the mutant strain and absent in the IV.1 strain.

### Supplementary Figure 8B

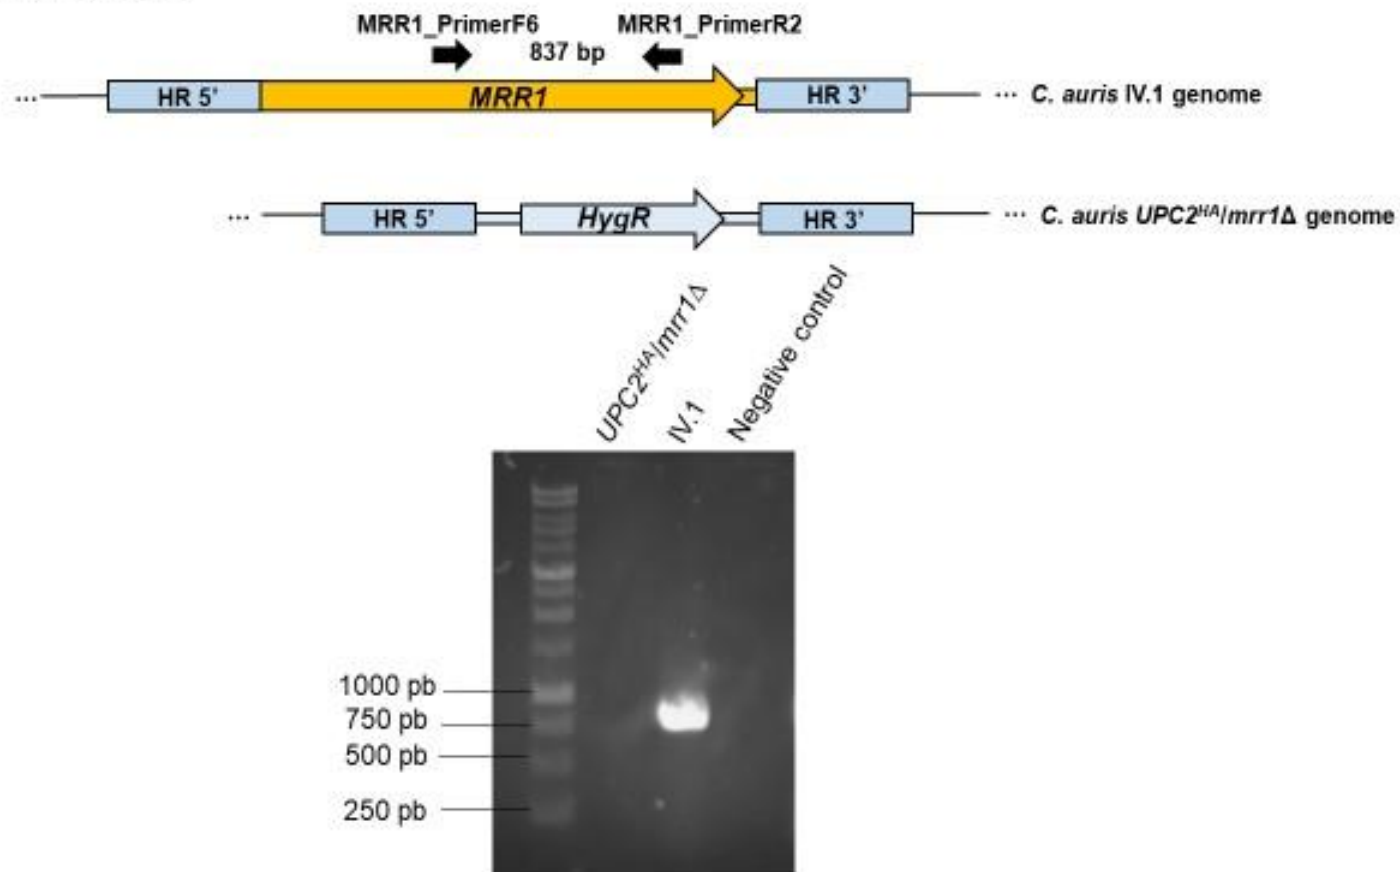

**Verification of the deletion of *MRR1* in the *UPC2<sup>HA</sup>/mrr1Δ* strain.** An approximately 800 pb fragment was amplified with two primers located within *MRR1*. As shown on the electrophoresis gel, the PCR product was present in the IV.1 strain and absent in the mutant strain.
